# Supplementary material for: Helicobacter pylori-induced fibroblast-derived Serpin E1 promotes gastric cancer growth and peritoneal dissemination through p38 MAPK/VEGFA-mediated angiogenesis
Source: Springer Nature journal article supplement (doi:10.1186/s12935-023-03177-1), 2023-12-16
Supplement: MOESM1 [file 26536196]

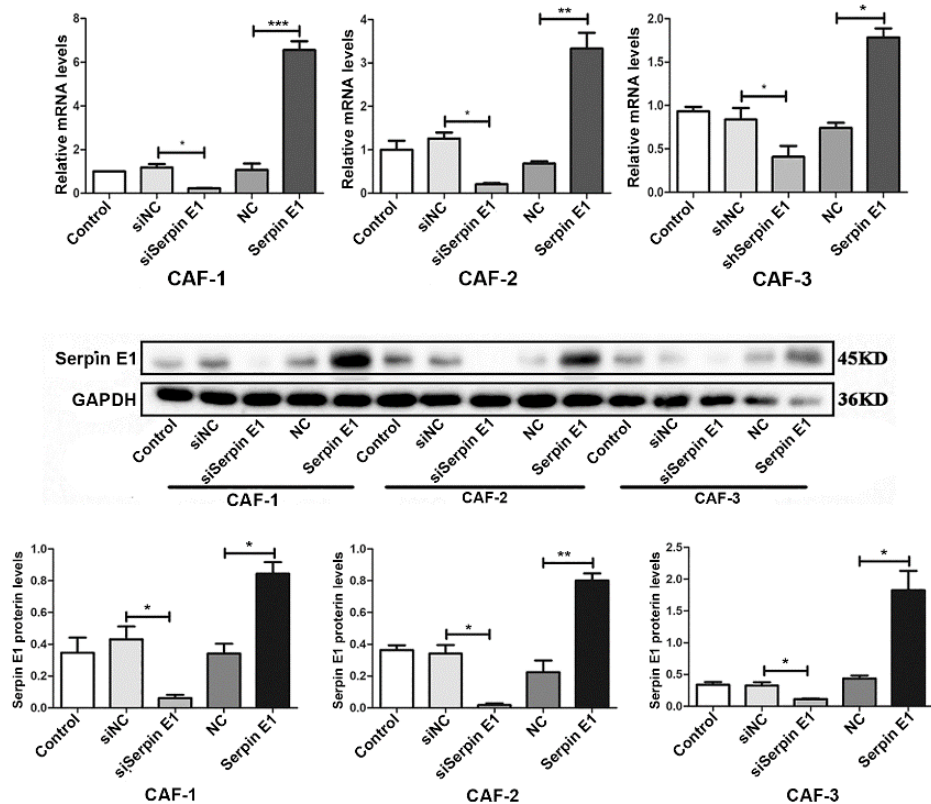

**Figure S1.** Identification of Serpin E1 expression in Serpin E1-knocked down and -overexpressed cancer-association fibroblasts (CAFs) by RT-qPCR and western blotting. \*  $p < 0.05$ , \*\*  $p < 0.01$ , and \*\*\*  $p < 0.001$

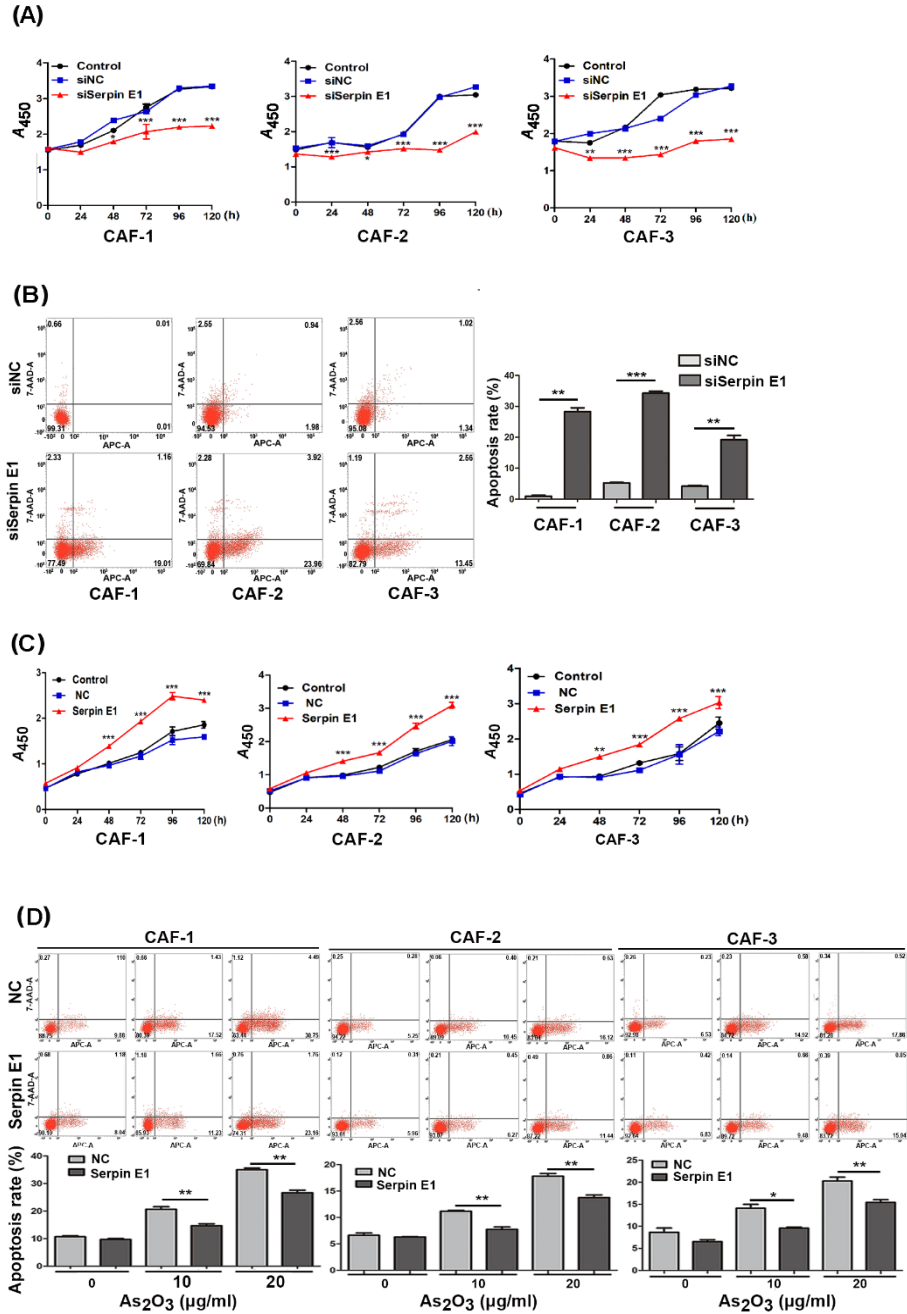

**Figure S2.** Knockdown and overexpression of Serpin E1 impact the growth and apoptosis of CAFs. **A, C** Knockdown (**A**) or overexpression (**C**) of Serpin E1 inhibits or increases the viability of CAFs by CCK8 assay. **B, D** Knockdown (**B**) or overexpression (**D**) of Serpin E1 promotes apoptosis or protects against As<sub>2</sub>O<sub>3</sub>-induced apoptosis in CAFs by flow cytometry. Line and bar graphs show the mean  $\pm$  SD; \* $p$ <0.05, \*\* $p$ <0.01, and \*\*\* $p$ <0.001

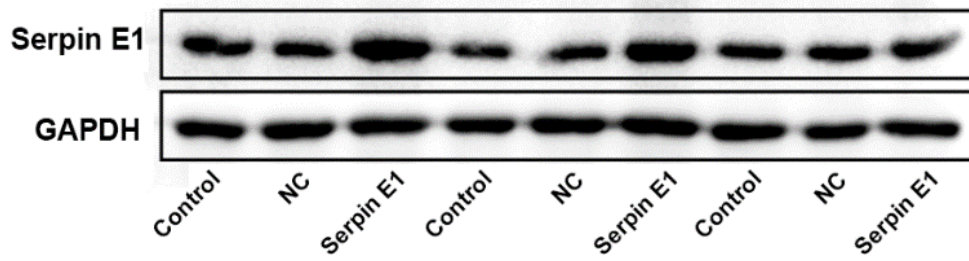

**Figure S3.** Identification of Serpin E1 protein expression in Serpin E1-overexpressed Hs738 cells (a human gastric fibroblast cell line)

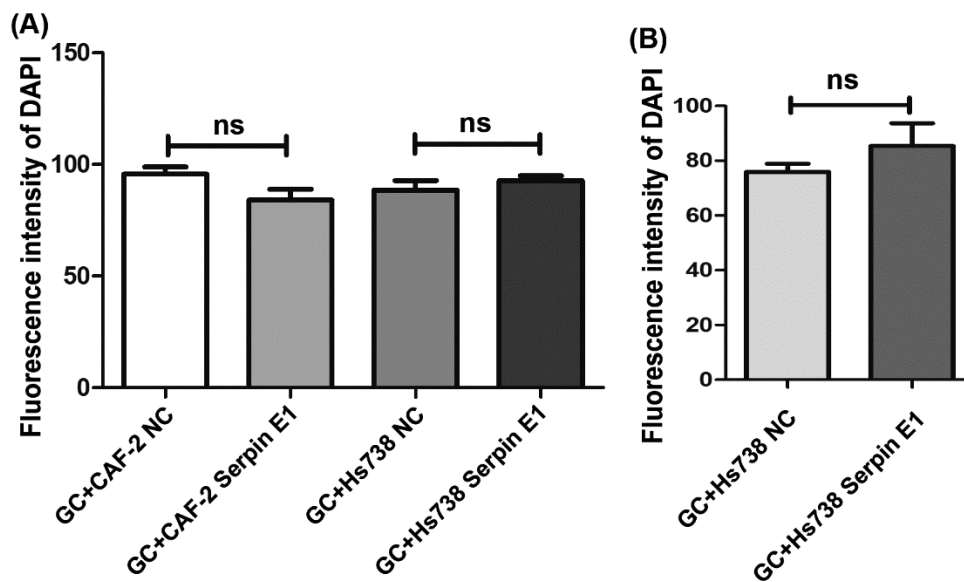

**Figure S4.** DAPI fluorescence intensity in Figure 5 was quantified in the subcutaneous (A) and peritoneal (B) tumors using Image J software. Data was presented as the mean  $\pm$  SD (n=3), with “ns” indicating no statistically significant difference.

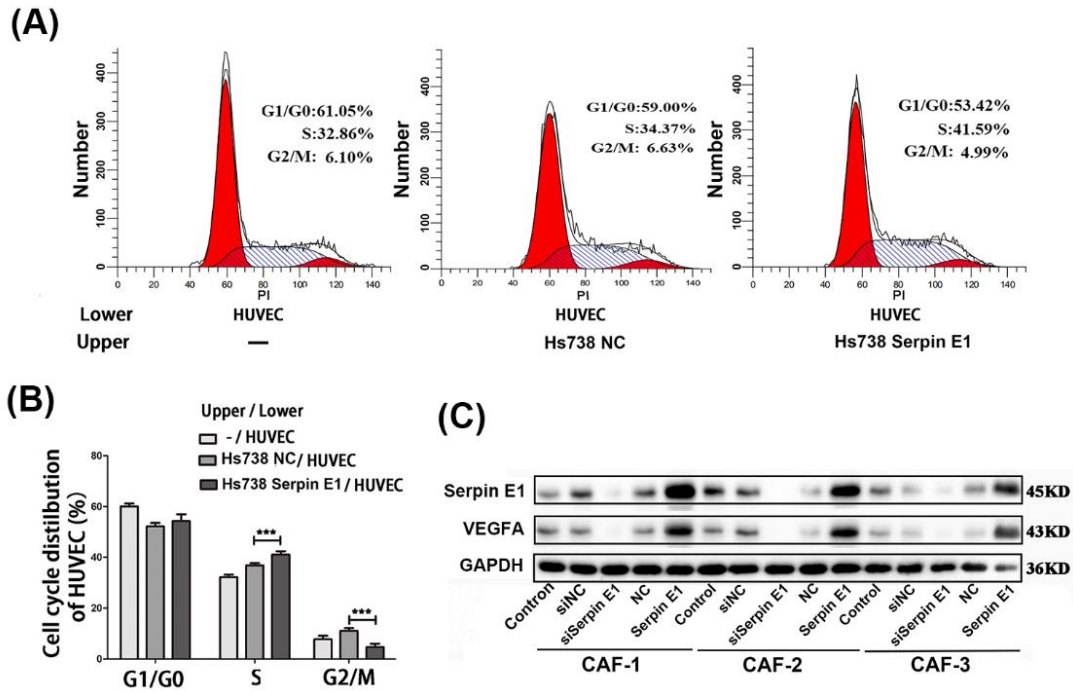

**Figure S5.** Fibroblast-derived Serpin E1 prompts the cycle progression of HUVECs and VEGFA expression in CSFs. **A** Cell-cycle distribution was analyzed by flow cytometry in HUVECs co-cultured with Serpin E1-overexpressed Hs738 cells. **B** Quantification of cell-cycle distribution. **C** Western blotting analysis of VEGFA in Serpin E1 knockdown and overexpression CAFs. Data were presented as the mean  $\pm$  SD; \*\*\* $p$ <0.001.

**Table S1** Primary and secondary antibodies used in the study

| Proteins              | Antibodies                                | Dilution<br>(Western blot) | Dilution<br>(IHC/IF) | Catalog<br>number | Company     |
|-----------------------|-------------------------------------------|----------------------------|----------------------|-------------------|-------------|
| Serpin E1             | Rabbit pAb                                | 1:800                      | 1:200                | Ab66705           | Abcam       |
| Ki67                  | Mouse mAb                                 | NA                         | 1:200                | 9449S             | CST         |
| CD31                  | Rabbit mAb                                | NA                         | 1:250                | Ab182981          | Abcam       |
| VEGFA                 | Rabbit mAb                                | 1:600                      | 1:250                | EP1176Y           | Abcam       |
| P-p38                 | Rabbit pAb                                | 1:1000                     | NA                   | 28796-1-AP        | Proteintech |
| p38                   | Mouse mAb                                 | 1:1000                     | NA                   | 66234-1           | Proteintech |
| P-ERK1/2              | Rabbit mAb                                | 1:1000                     | NA                   | 27833-1-AP        | Proteintech |
| ERK1/2                | Rabbit mAb                                | 1:1000                     | NA                   | 11257-1-AP        | Proteintech |
| P-JNK                 | Rabbit pAb                                | 1:2000                     | NA                   | 80024-1-RR        | Proteintech |
| JNK                   | Mouse mAb                                 | 1:1000                     | NA                   | 66210-1           | Proteintech |
| CK18                  | Mouse pAb                                 | NA                         | 1:400                | 66187-1-Ig        | Proteintech |
| GAPDH                 | Rabbit pAb                                | 1:1000                     | NA                   | 10494-1-AP        | Proteintech |
| Secondary<br>antibody | Gost IgG (HRP<br>-conjugated)             | 1:8000                     | 1:400                | SA00001-2         | Proteintech |
| Secondary<br>antibody | Gost IgG<br>(CoraLite594 -<br>conjugated) | NA                         | 1:300                | SA00013-4         | Proteintech |
